# Supplementary material for: Strong adhesion of poly(vinyl alcohol)–glycerol hydrogels onto metal substrates for marine antifouling applications
Source: Royal Society of Chemistry journal article supplement (doi:10.1039/c9sm01413f), 2019-12-10
Supplement: c9sm01413f1.pdf [file c9sm01413f1.pdf]

## Supporting Information

### **Strong adhesion of poly(vinyl alcohol)-glycerol hydrogels onto metal substrates for marine antifouling application**

Heng-Wei Zhu<sup>a</sup>, Jia-Nan Zhang<sup>a</sup>, Pei Su<sup>b</sup>, Tianqi Liu<sup>a</sup>, Changcheng He<sup>a\*</sup>,  
Danqing Feng<sup>b\*</sup>, and Huiliang Wang<sup>a</sup>

<sup>a</sup>Beijing Key Laboratory of Energy Conversion and Storage Materials,  
College of Chemistry, Beijing Normal University, Beijing 100875, P. R.  
China. E-mail: herbert@bnu.edu.cn

<sup>b</sup>State-Province Joint Engineering Laboratory of Marine Bioproducts and  
Technology, College of Ocean & Earth Sciences, Xiamen University,  
Xiamen, 361102, P. R. China. E-mail: dqfeng@xmu.edu.cn

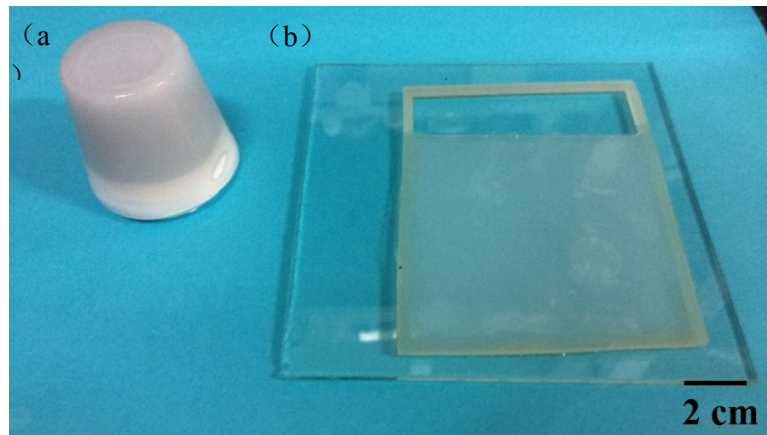

**Fig. S1.** Photograph of PVA-glycerol hydrogels. (a) Curved coating; (b) Planar coating.

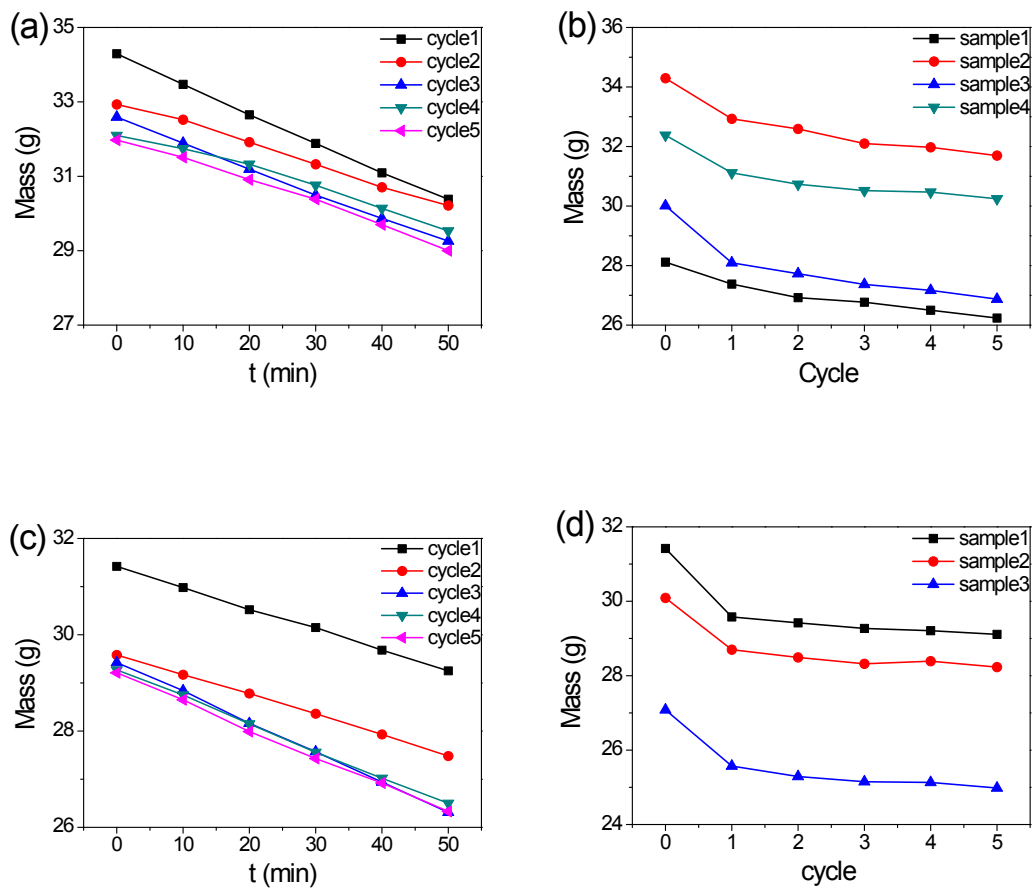

**Fig. S2** Quality change of PVA-glycerol hydrogel adhered to the stainless steel cup in the "water losing- absorbing" cycle. (a,c) The mass change of the PVA-glycerol hydrogel adhered by the ECA adhesive ( $V_{\text{ECA}}:V_{\text{paraffin}} = 1:1$ ) with drying time being immersed in deionized water (a) and simulated seawater (c); (b, d) Quality change of

PVA hydrogel after each "water losing- absorbing" cycle in deionized water (b) and simulated seawater (d).

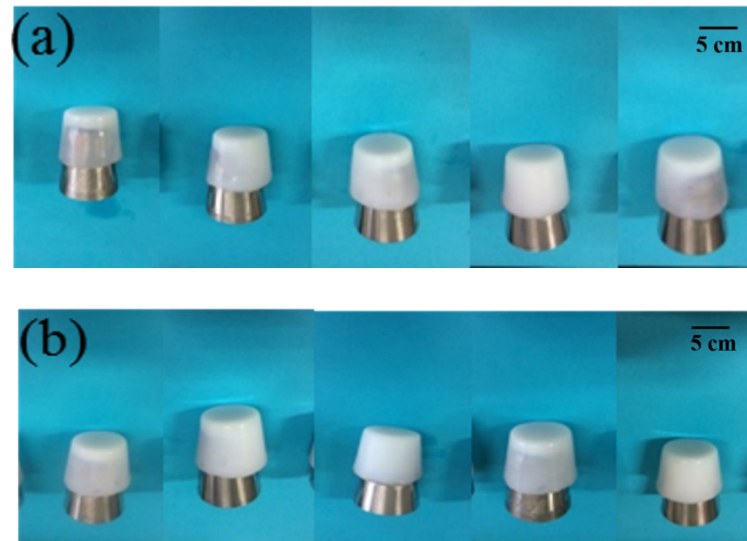

**Fig. S3** Photographs of the "PVA-glycerol gel/stainless steel cup" composite structure with ECA adhesive ( $V_{\text{ECA}}: V_{\text{paraffin}} = 1:1$ ) after several "water losing- absorbing" cycles in simulated seawater. Photos from left to right refer to samples after 1, 2, 3, 4 and 5 times water losing (a) and water absorbing treatment (b), respectively.
